# Supplementary material
Source: publisher figshare collection journal article supplement (https://gsapubs.figshare.com/ndownloader/files/22757978)

## Data repository: Statistical methods

The following is written with reference to the Statistical Methods section, and explains more fully the terminology and methods used.

The survivor function,  $S(x)$ , gives the probability,  $P$ , of exceedance, such that

$$S(x) = P(X > x) = 1 - F(x) \quad (A)$$

For a sample,  $S(x)$  is calculated by rank ordering observations from  $X_{i=0}$  to  $X_n$ , where  $n$  is the total number of observations, and  $S(x_i) = (n-i)/n$ . This may then be fitted to a continuous probability distribution survivor function (e.g., Weibull or log-logistic) and be used as a model for forecasting (e.g., Connor et al., 2003).

Probability plots provide a quick assessment of whether data may be described by a particular distribution. Plot axes are constructed by linearizing the cumulative distribution function,  $F(x)$ . If the data are described by the subject distribution they will plot a straight line, with slope  $a$  and intercept  $b$ . For the Weibull distribution, with repose times  $t$ , linearization results in the axes:

$$x = \ln(t) \text{ and } y = \ln(\ln(1/(1 - Q(t)))) \quad (B)$$

where  $Q(t)$  ( $= F(x)$ ) is the unreliability, and is estimated by Benard's approximation to the median rank:  $p = (i - 0.3)/(n + 0.4)$ , where  $i$  is the observation rank. By definition  $b$  is the  $x$ -value at an unreliability of 0.632 (for  $a = 1$  this is equal to the distribution mean).

Linearization of the log-logistic cumulative density function for probability plot construction, with slope  $a$  and intercept  $b$ , gives:

$$x = \ln(t) \text{ and } y = \ln[Q(t)/(1 - Q(t))] \quad (C)$$

Such analysis can be undertaken using any plotting package, such as Excel.

With reference to Kolmogorov-Smirnov  $P$ -values (Massey, 1951): Since model parameters are estimated from the sample, our  $P$ -values are conservative; only a high value (perhaps  $P > 0.9$ , for our  $n$ ) suggests a model is suitable for describing the sample distribution. The Kolmogorov-Smirnov test does not assume a distribution, and assesses goodness of fit from the maximum deviation between the cumulative distribution function of the data and the model distribution.

### **Data repository: Figures**

Figure DR1. Survivor functions of best fitting Weibull and log-logistic models against explosion repose interval data from Anak Krakatau. A: 12–13/1/1960; B: 12/1/1960.

Insets show histograms of data with the corresponding Weibull and log-logistic probability density functions.

Figure DR2. Survivor functions of best fitting Weibull and log-logistic models against column height data from Anak Krakatau. A: 12–13/1/1960; B: 12/1/1960; C: 13/1/1960.

Insets show histograms of data with the corresponding Weibull and log-logistic probability density functions.

Figure DR3. Cumulative distribution functions showing showing explosion data from the Kameni Islands against best-fitting Weibull and log-logistic curves. A: 12/02–25/3/1866, ash explosion frequency; B: 12/02–25/3/1866, steam explosion frequency; C: 12/02–25/3/1866, detonation frequency (Schmidt, 1872); D: 14/08–16/09/1925, explosion

frequency, during the initial paroxysmal stage of the 1925–2928 eruption; E: 23/09–14/10/1939, initial vigorous stage, explosion frequency at the Kténas dome; F: 15/10–24/11/1939, subsequent quieter stage, explosion frequency at the Kténas dome; G: 22/02–23/02/1926, explosion repose intervals during a late eruption period of reduced activity.

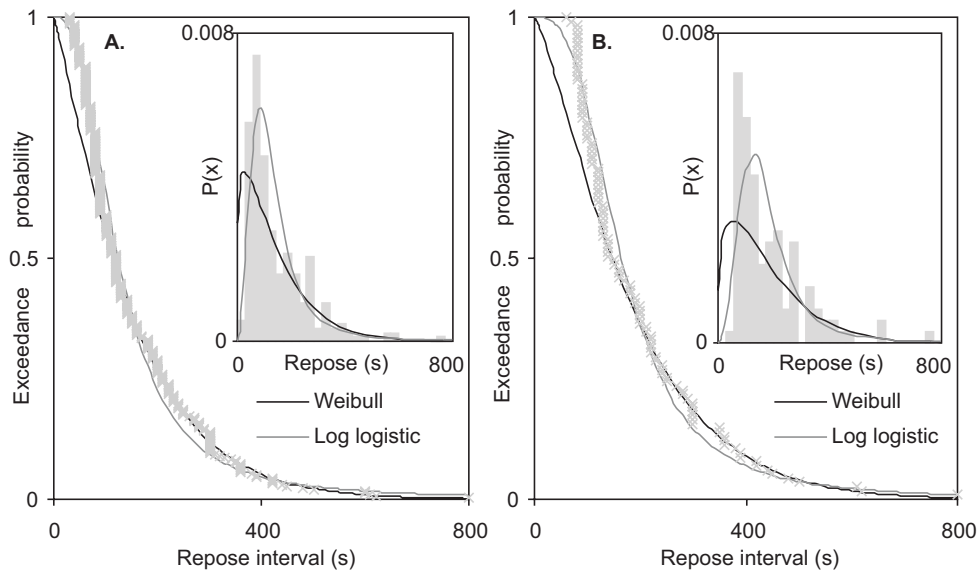

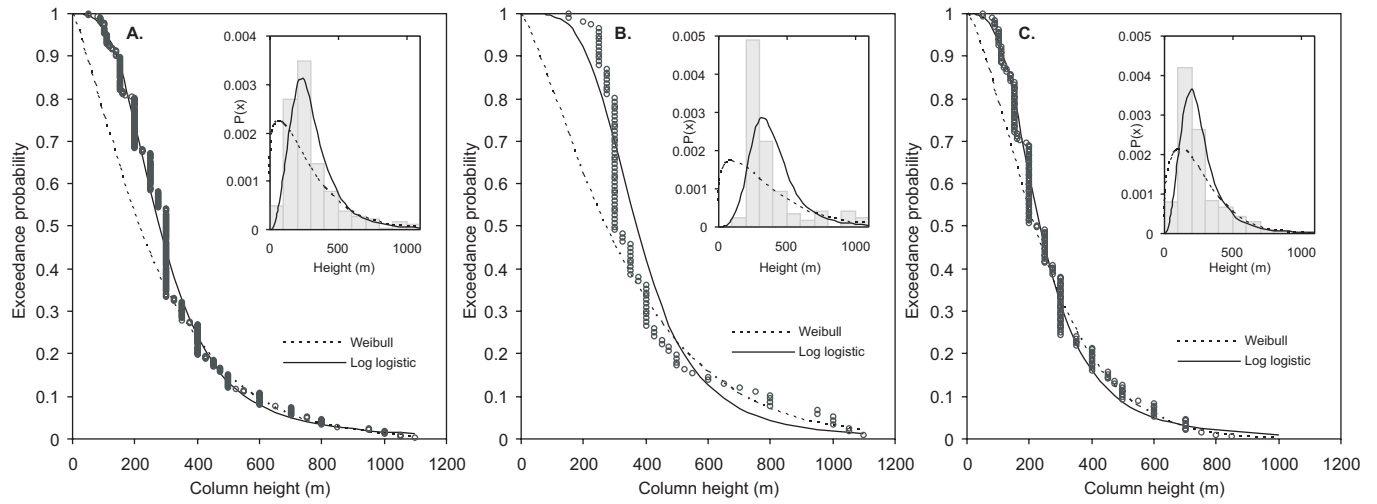

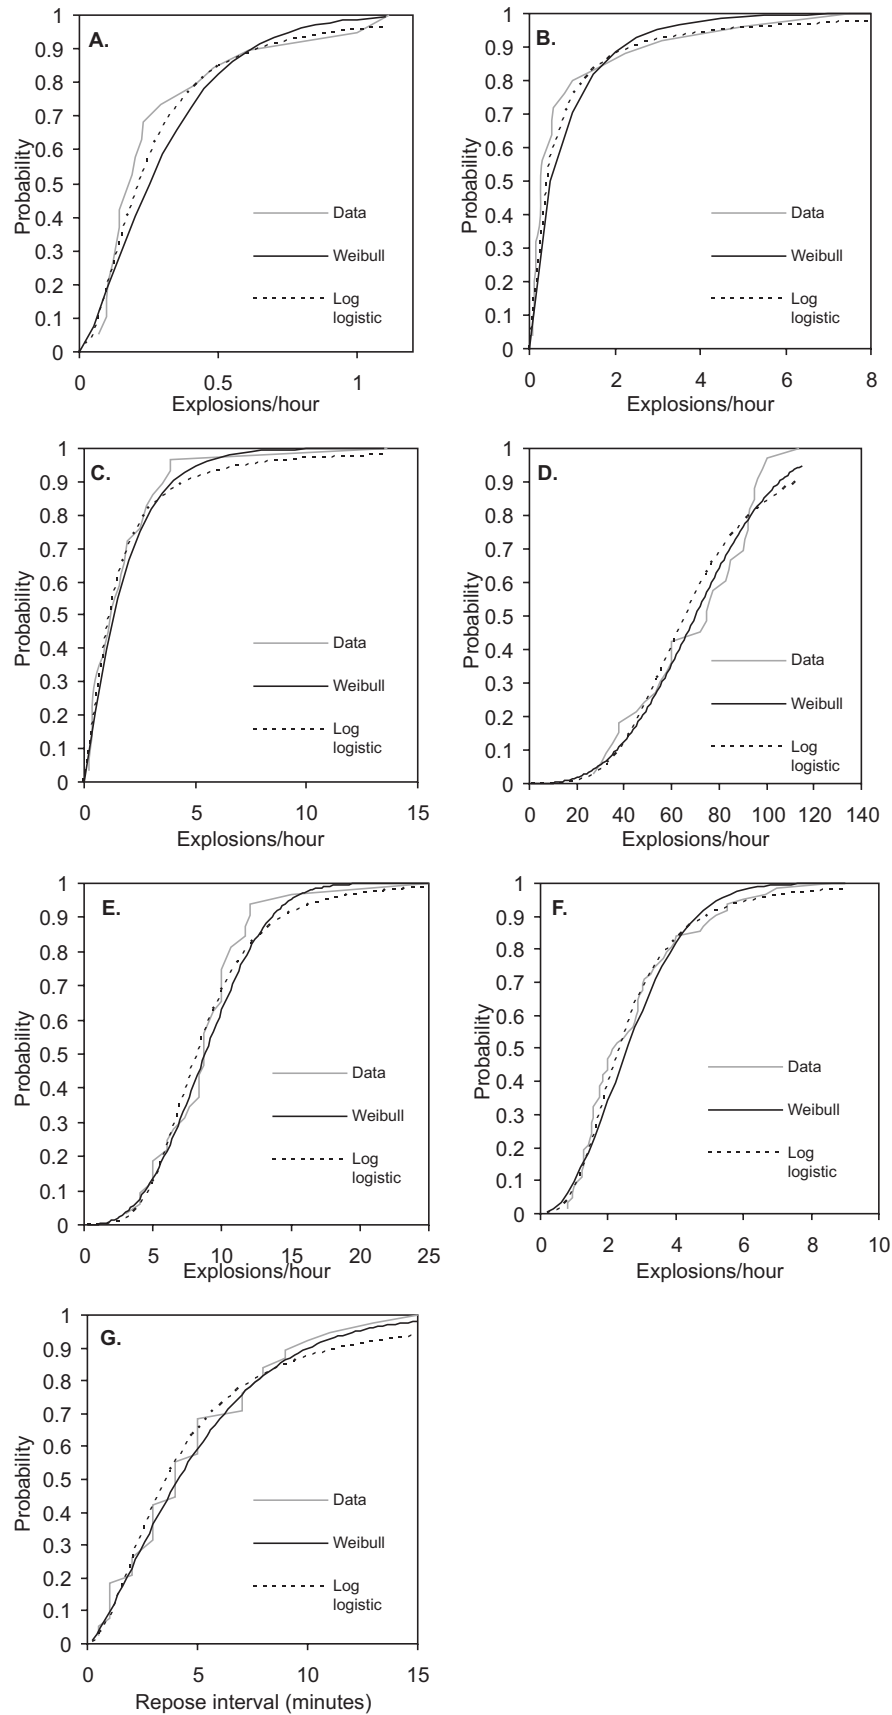

Supplement: Supplementary file 1 [file 22757978]
